# Supplementary material
Source: PubMed Central journal article supplement (PMC4056817)

# Discovery of A New Human A<sub>2A</sub> Adenosine Receptor Agonist, Truncated 2-Hexynyl-4'-thioadenosine

Xiyang Hou,<sup>1</sup> Hea Ok Kim,<sup>1</sup> Varughese Alexander,<sup>1</sup> Kyunglim Kim,<sup>1</sup> Sun Choi,<sup>1</sup> Seul-gi Park,<sup>1</sup>  
Jin Hee Lee,<sup>1</sup> Lena S. Yoo,<sup>2</sup> Zhan-Guo Gao,<sup>2</sup> Kenneth A. Jacobson,<sup>2</sup> and Lak Shin Jeong\*,<sup>1,3</sup>

<sup>1</sup> *Laboratory of Medicinal Chemistry, College of Pharmacy, Ewha Womans University, Seoul 120-750, Korea,* <sup>2</sup> *Molecular Recognition Section, Laboratory of Bioorganic Chemistry, National Institute of Diabetes, and Digestive and Kidney Disease, National Institutes of Health, Bethesda, Maryland 20892, USA, and* <sup>3</sup> *Department of Bioinspired Science, Ewha Womans University, Seoul 120-750, Korea*

[lakjeong@ewha.ac.kr](mailto:lakjeong@ewha.ac.kr)

## Supporting Information

**Experimental Procedure.....S2**

**<sup>1</sup>H Copies of 4a, 4b, 4c, and 4d.....S10**

**<sup>13</sup>C Copies of 4a, 4b, 4c, and 4d.....S13**

**General Methods.** <sup>1</sup>H NMR spectra (CDCl<sub>3</sub>, CD<sub>3</sub>OD, or DMSO-*d*<sub>6</sub>) were recorded on Varian

Unity Inova 400 MHz. Chemical shifts are reported in parts per million ( $\delta$ ) units relative to the solvent peak. The  $^1\text{H}$  NMR data are reported as peak multiplicities: s for singlet; d for doublet; dd for doublet of doublets; t for triplet; pseudo t for pseudo triplet; brs for broad singlet; and m for multiplet. Coupling constants were reported in Hertz.  $^{13}\text{C}$  NMR spectra ( $\text{CDCl}_3$ ,  $\text{CD}_3\text{OD}$ , or  $\text{DMSO}-d_6$ ) were recorded on Varian Unity Inova 100 MHz. NOE experiments were recorded on Varian Unity Inova 400 MHz, using  $\text{CDCl}_3$  and  $\text{DMSO}-d_6$  as solvent and a mixing time of 1 second. The chemical shifts are reported as ppm ( $\delta$ ) relative to the solvent peak. Mass spectra were recorded on Agilent Technologies 6220 Accurate-Mass TOF LC/MS spectrometer. Melting points were measured on IA9100 made by Barnstead. These are uncorrected. UV spectra were recorded on U-3000 made by Hitachi in methylene chloride or methanol. Optical rotations were determined on Jasco III in methylene chloride or methanol. Infrared spectra were recorded on FT-IR (FTS-135) made by Bio-Rad. Reactions were checked with TLC (Merck precoated 60F254 plates). Spots were detected by viewing under a UV light, colorizing with charring after dipping in anisaldehyde solution with acetic acid and sulfuric acid and methanol. Column chromatography were performed on silica gel 60 (230-400 mesh, Merck). Reagents were purchased from Aldrich Chemical Company. Solvents were obtained from local suppliers. All the anhydrous solvents were distilled over  $\text{CaH}_2$ ,  $\text{P}_2\text{O}_5$ , or  $\text{Na/benzophenone}$  prior to the reaction.

**6-chloro-9-((3a*S*,4*R*,6a*R*)- tetrahydro-2,2-dimethylthieno[3,4-*d*][1,3]dioxol-4-yl)-9*H*-purin-2-amine (6)**

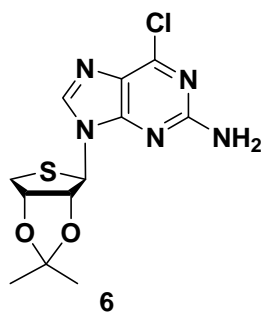

A solution of 2-amino-6-chloropurine (0.91 g, 5.35 mmol), ammonium sulfate (106 mg, 0.80 mmol) and HMDS (10 mL) were refluxed overnight, under dry and inert conditions. The solution was then carefully evaporated under high vacuum. The solid residue thus obtained, was dissolved in 1,2-dichloroethane (5 mL) and cooled to 0 °C. The solution of **5** (0.58 g, 2.68 mmol) in 1,2-dichloroethane (5 mL) was added dropwise to the above mixture. Then, TMSOTf (0.97 mL, 5.35 mmol) was dropwise added and the mixture was stirred for 30

minutes at 0 °C, for 1 h at rt, and finally heated at 90 °C for 2 h. The reaction mixture was cooled, diluted with CH<sub>2</sub>Cl<sub>2</sub> and washed with saturated NaHCO<sub>3</sub> solution. The extracted organic layer was dried with MgSO<sub>4</sub> and evaporated under reduced pressure. The crude syrup was subjected to flash silica gel column chromatography (Hexane : EtOAc = 1:1) to give **6** (0.27 g, 30%) as a solid: mp 199.1-199.2 °C; UV (CH<sub>2</sub>Cl<sub>2</sub>) λ<sub>max</sub> 305.0 nm; <sup>1</sup>H NMR (CDCl<sub>3</sub>) δ 7.87 (s, 1 H), 5.73 (s, 1 H), 5.29 (brs, 2 H, NH<sub>2</sub>), 5.16-5.21 (m, 2H), 3.64 (dd, 1 H, *J* = 4.4, 13.2 Hz), 3.20 (d, 1 H, *J* = 13.2 Hz), 1.58 (s, 3 H), 1.35 (s, 3 H); <sup>13</sup>C NMR (CDCl<sub>3</sub>) δ 159.14, 153.21, 151.91, 141.14, 126.24, 111.96, 89.50, 84.23, 69.48, 40.78, 26.54, 24.83; [α]<sup>25</sup><sub>D</sub> -42.23 (*c* 0.16, CH<sub>2</sub>Cl<sub>2</sub>); (ESI+) (M+Na<sup>+</sup>) *m/z* 350.0443; Anal. Calcd for C<sub>12</sub>H<sub>14</sub>ClN<sub>5</sub>O<sub>2</sub>S: C, 43.97; H, 4.30; Cl, 10.82; N, 21.37; O, 9.76; S, 9.78. Found: C, 43.98; H, 4.28; N, 20.99; S, 10.00.

**6-chloro-9-(3a*S*,4*R*,6a*R*)- tetrahydro-2,2-dimethylthieno[3,4-*d*][1,3]dioxol-4-yl)-2-iodo-9*H*-purine (7).**

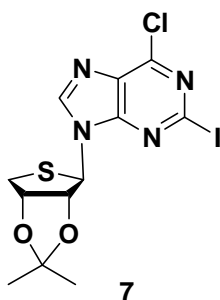

Isoamylnitrite (0.31 mL, 2.27 mmol) was added to a mixture of **6** (248 mg, 0.76 mmol), I<sub>2</sub> (192 mg, 0.76 mmol), CH<sub>2</sub>I<sub>2</sub> (0.95 mL, 7.60 mmol) and CuI (159 mg, 0.83 mmol) in 10 mL THF at rt. The mixture was then allowed to reflux for 45 min and finally cooled to room temperature. Insoluble materials were removed by filtration and the filtrate thus obtained was concentrated to dryness. The crude residue was purified by means of silica gel column chromatography, which was washed with hexane until the color of iodine disappeared and then eluted with Hexane : EtOAc = 7 : 1, to give **7** (233 mg 72%) as a syrup: UV (CH<sub>2</sub>Cl<sub>2</sub>) λ<sub>max</sub> 282.0 nm; <sup>1</sup>H NMR (CDCl<sub>3</sub>) δ 8.06 (s, 1 H), 5.84 (s, 1 H), 5.33 (pseudo t, 1 H, *J* = 5.2 Hz), 5.21 (d, 1 H, *J* = 5.6 Hz), 3.80 (dd, 1 H, *J* = 4.4, 12.8 Hz), 3.26 (d, 1 H, *J* = 12.8 Hz), 1.59 (s, 3 H), 1.37 (s, 3 H); <sup>13</sup>C NMR (CDCl<sub>3</sub>) δ 151.91, 151.21, 144.39, 132.65, 116.74, 112.13, 89.97, 84.85, 70.73, 41.48, 26.60, 24.78; [α]<sup>25</sup><sub>D</sub> -66.33 (*c* 0.10, CH<sub>2</sub>Cl<sub>2</sub>); (ESI+) (M+H<sup>+</sup>) *m/z* 438.9492; Anal. Calcd. for C<sub>12</sub>H<sub>12</sub>ClIN<sub>4</sub>O<sub>2</sub>S: C, 32.86; H, 2.76; Cl, 8.08; I, 28.93; N, 12.77; O, 7.29; S, 7.31. Found: C, 32.99; H, 2.48; N, 12.99; S, 7.01.

**9-((3a*S*,4*R*,6a*R*)- tetrahydro-2,2-dimethylthieno[3,4-*d*][1,3]dioxol-4-yl)-2-iodo-9*H*-purin-6-amine (8)**

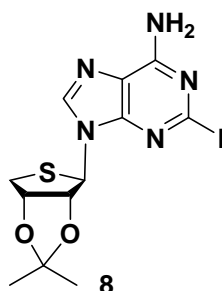

A solution of **7** (535 mg, 1.22 mmol) in methanolic ammonia (5 mL) was stirred for 2 h at 80 °C. The reaction mixture was concentrated to dryness and the crude residue was subjected to flash silica gel column chromatography (Hexane : EtOAc = 1 : 1) to give **8** (439 mg, 85%) as a syrup: UV (CH<sub>2</sub>Cl<sub>2</sub>) λ<sub>max</sub> 267.0 nm; <sup>1</sup>H NMR (CD<sub>3</sub>OD) δ 8.20 (s, 1 H), 5.97 (s, 1 H), 5.30 (pseudo t, 1 H, *J* = 5.2 Hz), 5.23 (d, 1 H, *J* = 5.6 Hz), 3.80 (dd, 1 H, *J* = 4.4, 12.8 Hz), 3.14 (d, 1 H, *J* = 12.8 Hz), 1.54 (s, 3 H), 1.35 (s, 3 H); <sup>13</sup>C NMR (CD<sub>3</sub>OD) δ 156.11, 150.37, 141.97, 119.96, 117.99, 112.68, 91.19, 86.37, 71.30, 41.58, 26.84, 24.86. [α]<sub>D</sub><sup>25</sup> -61.90 (*c* 0.08, CH<sub>2</sub>Cl<sub>2</sub>); (ESI+) (M+H<sup>+</sup>) *m/z* 419.998; Anal. Calcd. for C<sub>12</sub>H<sub>14</sub>IN<sub>5</sub>O<sub>2</sub>S: C, 34.38; H, 3.37; I, 30.27; N, 16.70; O, 7.63; S, 7.65. Found: C, 33.56; H, 3.28; N, 16.99; S, 7.23.

**(2*R*,3*S*,4*R*)-2-(6-amino-2-(hex-1-ynyl)-9*H*-purine-9-yl)-tetrahydrothiophene-3,4-diol (4a)**

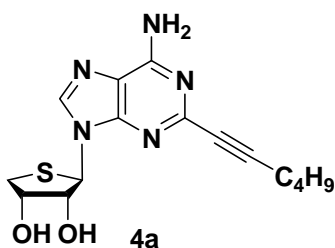

Compound **8** (96 mg, 0.23 mmol) was dissolved in Et<sub>3</sub>N (1.5 mL) and DMF (1 mL). After purging the solution with N<sub>2</sub>, (PPh<sub>3</sub>)<sub>2</sub>PdCl<sub>2</sub> (16 mg, 0.023 mmol) and CuI (4.3 mg, 0.023 mmol) were added. 1-Hexyne (0.065 mL, 0.57 mmol) was subsequently added dropwise and the mixture was stirred at room temperature for 3 h. The solvents were removed under reduced pressure, to give the crude compound **9**. To a solution of **9** in THF (5 mL) was added 1 *N* hydrochloric acid (5 mL) and the mixture stirred at room temperature for 1 day. The crude residue was neutralized with 1 *N* NaOH solution, and then carefully evaporated under reduced pressure. The mixture was subjected to flash silica gel column chromatography

(CH<sub>2</sub>Cl<sub>2</sub> : MeOH = 20 : 1) to give **4a** (50 mg , 65%) as a white solid: mp 234.2-234.8 °C; UV (MeOH) λ<sub>max</sub> 289.5 nm; <sup>1</sup>H NMR (CD<sub>3</sub>OD) δ 8.45 (s, 1 H), 5.98 (d, 1 H, *J* = 6.4 Hz), 4.56-4.59 (m, 1 H), 4.44 (dd, 1 H, *J* = 4.4, 8.0 Hz), 3.51 (dd, 1 H, *J* = 4.8, 10.8 Hz), 2.96 (dd, 1 H, *J* = 4.0, 10.8 Hz), 2.46 (t, 2 H, *J* = 6.8 Hz), 1.60-1.67 (m, 2 H), 1.48-1.57 (m, 2 H), 0.98 (t, 3 H, *J* = 7.2 Hz); <sup>13</sup>C NMR (CD<sub>3</sub>OD) δ 157.08, 151.32, 147.94, 142.27, 119.80, 88.50, 81.20, 80.90, 74.37, 63.94, 35.11, 31.55, 23.11, 19.46, 13.97. [α]<sub>D</sub><sup>25</sup> -28.36 (*c* 0.20, MeOH); (ESI+) (M+H<sup>+</sup>) *m/z* 334.1335; Anal. Calcd. for C<sub>15</sub>H<sub>19</sub>N<sub>5</sub>O<sub>2</sub>S: C, 54.04; H, 5.74; N, 21.01; O, 9.60; S, 9.62. Found: C, 54.44; H, 5.88; N, 20.98; S, 10.00.

**(2*R*,3*S*, 4*R*)-2-(6-amino-2-(*E*)-hex-1-enyl)-9*H*-purine-9-yl)-tetrahydrothiophene-3,4-diol (4b)**

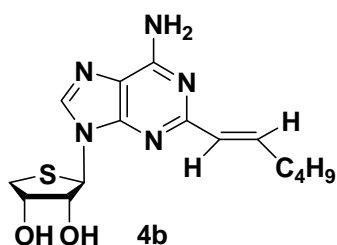

A mixture of **8** (46 mg, 0.11 mmol), tetrakis(triphenylphosphine) palladium(0) (13mg, 0.011 mmol), sodium carbonate (35 mg, 0.33 mmol) and (*E*)-1-catecholboranylhexene (*Organic Syntheses, Coll. Vol. 8, p. 532 (1993); Vol. 68, p. 130 (1990)*) (67 mg, 0.33 mmol) in DMF and H<sub>2</sub>O (8 : 1, 5 mL) was stirred for overnight at 90 °C. The reaction mixture was filtered over a celite bed and the residue was concentrated to give the crude compound **10**. To a solution of **10** in THF (5 mL) was added 1 *N* hydrochloric acid (5 mL) and the mixture stirred at room temperature for 1 day. The mixture was neutralized with 1 *N* NaOH solution, and then carefully evaporated under reduced pressure. The crude residue was subjected to flash silica gel column chromatography (CH<sub>2</sub>Cl<sub>2</sub> : MeOH = 20 : 1) to give **4b** (23 mg , 63%) as a white solid : mp 209.1-209.6 °C; UV (MeOH) λ<sub>max</sub> 274.5 nm; <sup>1</sup>H NMR (DMSO-*d*<sub>6</sub>) δ 8.37 (s, 1 H), 7.11 (brs, 2 H, NH<sub>2</sub>), 6.90 (tt, 1 H, *J* = 6.8, 15.6 Hz), 6.29 (tt, 1 H, *J* = 1.6, 15.2 Hz), 5.89 (d, 1 H, *J* = 7.2 Hz), 5.52 (d, 1 H, OH, *J* = 6.0 Hz), 5.36 (d, 1 H, OH, *J* = 4.0 Hz), 4.63-4.67 (m, 1 H), 4.37 (pseudo t, 1 H, *J* = 3.2 Hz), 3.42 (dd, 1 H, *J* = 4.4, 10.8 Hz), 2.80 (dd, 1 H, *J* = 2.8, 10.8 Hz); 2.20-2.26 (m, 2 H), 1.41-1.48 (m, 2 H), 1.29-1.38 (m, 2 H), 0.90 (t, 3 H, *J* = 7.2 Hz); <sup>13</sup>C NMR (DMSO-*d*<sub>6</sub>) δ 158.20, 155.49, 150.61, 139.60, 138.18, 130.44, 117.70, 78.51, 72.28, 61.02, 34.39, 31.40, 30.54, 21.73, 13.75. [α]<sub>D</sub><sup>25</sup> -28.36 (*c* 0.20, MeOH);

(ESI+) (M+H<sup>+</sup>) m/z 336.1494; [ $\alpha$ ]<sub>D</sub><sup>25</sup> -44.80 (c 0.12, MeOH); Anal. Calcd for C<sub>15</sub>H<sub>21</sub>N<sub>5</sub>O<sub>2</sub>S: C, 53.71; H, 6.31; N, 20.88; O, 9.54; S, 9.56. Found: C, 53.98; H, 6.28; N, 20.96; S, 10.02.

**8-bromo-9-((3aR, 6R, 6aS)- tetrahydro-2,2-dimethylthieno[3,4-d][1,3]dioxol-6-yl)-9H-purin-2-amine (11).**

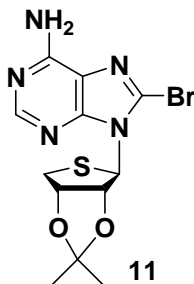

8-Bromoadenine (*J. Org. Chem.* **2001**, *66*, 5463-5481) (0.40 g, 1.84 mmol), ammonium sulfate (37 mg, 0.27 mmol) and HMDS (10 mL) were refluxed for overnight, under dry and inert conditions. The solution was evaporated under high vacuum. The resulting solid was dissolved in 1,2-dichloroethane (5 mL) and cooled at 0 °C. The solution of **5** (0.20 g, 0.92 mmol) in 1,2-dichloroethane (5 mL) was dropwise added to the above cooled mixture. To this TMSOTf (0.33 mL, 1.84 mmol) was dropwise added and the mixture was stirred for 30 minutes at 0 °C, for 1 h at rt, and finally heated at 90 °C for 2 h. The mixture was cooled, diluted with CH<sub>2</sub>Cl<sub>2</sub> and washed with saturated NaHCO<sub>3</sub> solution. The extracted organic layer was dried with MgSO<sub>4</sub> and evaporated under reduced pressure. The crude syrup was subjected to a flash silica gel column chromatography (Hexane : EtOAc = 1 : 1) to give **12** (69 mg, 20%) as a syrup: UV (MeOH)  $\lambda_{\text{max}}$  263.5 nm; <sup>1</sup>H NMR (CDCl<sub>3</sub>)  $\delta$  8.25 (s, 1 H), 5.91 (s, 1 H), 5.81 (brs, 2 H, NH<sub>2</sub>), 5.54 (d, 1 H, *J* = 5.2 Hz), 5.50 (pseudo t, 1 H, *J* = 5.2 Hz), 3.87 (dd, 1 H, *J* = 4.0, 12.4 Hz), 3.14 (d, 1 H, *J* = 12.4 Hz), 1.60 (s, 3 H), 1.38 (s, 3 H); <sup>13</sup>C NMR (CDCl<sub>3</sub>)  $\delta$  154.29, 153.03, 150.70, 127.76, 120.42, 111.41, 88.98, 85.99, 71.91, 41.35, 26.59, 24.65. [ $\alpha$ ]<sub>D</sub><sup>25</sup> -77.07 (c 0.16, CH<sub>2</sub>Cl<sub>2</sub>); (ESI+) (M+H<sup>+</sup>) m/z 373.0151; Anal. Calcd for C<sub>12</sub>H<sub>14</sub>BrN<sub>5</sub>O<sub>2</sub>S: C, 38.72; H, 3.79; Br, 21.47; N, 18.81; O, 8.60; S, 8.61. Found: C, 38.99; H, 3.77; N, 19.09; S, 8.26.

**(2R,3S,4R)-2-(6-amino-8-(hex-1-yl nyl)-9H-purine-9-yl)-tetrahydrothiophene-3,4-diol (4c)**

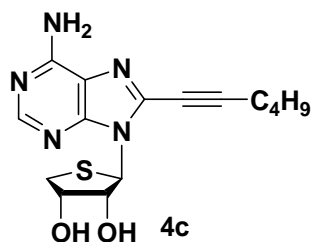

Compound **11** (69 mg, 0.19 mmol) was dissolved in Et<sub>3</sub>N (1.5 mL) and DMF (1 mL). After purging the solution with N<sub>2</sub>, (PPh<sub>3</sub>)<sub>2</sub>PdCl<sub>2</sub> (14 mg, 0.019 mmol) and CuI (3.7 mg, 0.019 mmol) were added. 1-hexyne (0.056 mL, 0.48 mmol) was subsequently added dropwise and the mixture was stirred at room temperature for 3 h. The solvents were removed under reduced pressure, to give the crude compound **12**. To a solution of **12** in THF (3 mL) was added 1 N hydrochloric acid (3 mL) and the mixture stirred at room temperature for 1 day. The mixture was neutralized with 1 N NaOH solution, and then carefully evaporated under reduced pressure. The crude residue was subjected to flash silica gel column chromatography (CH<sub>2</sub>Cl<sub>2</sub> : MeOH = 20 : 1) to give **4c** (36 mg, 58%) as a white solid: mp 233.8-234.9 °C; UV (MeOH) λ<sub>max</sub> 294.0 nm; <sup>1</sup>H NMR (DMSO-*d*<sub>6</sub>) 8.16 (s, 1 H), 7.40 (brs, 2 H, NH<sub>2</sub>), 6.03 (d, 1 H, *J* = 7.6 Hz), 5.44 (d, 1 H, -OH, *J* = 6.4 Hz), 5.33 (d, 1 H, OH, *J* = 4.0 Hz), 5.24-5.29 (m, 1 H), 4.40 (dd, 1 H, *J* = 1.6, 3.2 Hz), 3.42 (dd, 1 H, *J* = 3.6, 11.2 Hz), 2.80 (dd, 1 H, *J* = 2.0, 11.2 Hz), 2.59 (t, 2 H, *J* = 6.8 Hz), 1.55-1.62 (m, 2 H), 1.44-1.51 (m, 2 H), 0.93 (t, 3 H, *J* = 7.2 Hz); <sup>13</sup>C NMR (DMSO-*d*<sub>6</sub>) δ 155.71, 153.11, 149.10, 133.74, 118.91, 97.97, 76.51, 72.33, 70.72, 63.18, 35.52, 29.59, 21.38, 18.31, 13.41. [α]<sub>D</sub><sup>25</sup> -112.2 (*c* 0.14, MeOH); (ESI+) (M+H<sup>+</sup>) *m/z* 334.1339; Anal. Calcd for C<sub>15</sub>H<sub>19</sub>N<sub>5</sub>O<sub>2</sub>S: C, 54.04; H, 5.74; N, 21.01; O, 9.60; S, 9.62. Found: C, 54.00; H, 5.78; N, 20.99; S, 9.30.

**(2R,3S,4R)-2-(6-amino-8-(hex-1-enyl)-9H-purine-9-yl)-tetrahydrothiophene-3,4-diol (4d)**

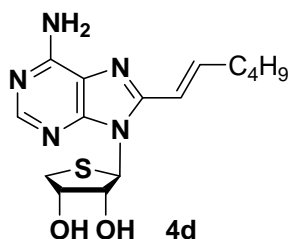

A mixture of **11** (42 mg, 0.12 mmol), tetrakis(triphenylphosphine) palladium(0) (14 mg, 0.012 mmol), sodium carbonate (37 mg, 0.35 mmol) and (*E*)-1-catecholboranylhexene (*Organic Syntheses, Coll. Vol. 8, p. 532 (1993); Vol. 68, p. 130 (1990)*) (72 mg, 0.35 mmol) in DMF and H<sub>2</sub>O (8 : 1, 5 mL) was stirred overnight at 90 °C. The reaction mixture was filtered

by a bed of celite and the residue was concentrated to give the crude compound **13**. To a solution of **13** in THF (3 mL) was added 1 N hydrochloric acid (3 mL) and the mixture stirred at room temperature for 1 day. The mixture was neutralized with 1 N NaOH solution, and then carefully evaporated under reduced pressure. The mixture was subjected to a flash silica gel column chromatography (CH<sub>2</sub>Cl<sub>2</sub> : MeOH = 20 : 1) to give **4d** (25 mg , 65%) as a white solid: mp 248.6-248.8 °C; UV (MeOH)  $\lambda_{\text{max}}$  297.5 nm; <sup>1</sup>H NMR (CD<sub>3</sub>OD)  $\delta$  8.15 (s, 1 H), 6.97 (tt, 1 H, *J* = 6.8, 15.6 Hz), 6.75 (tt, 1 H, *J* = 1.6, 15.2 Hz), 6.15 (d, 1 H, *J* = 8.0 Hz), 5.27 (dd, 1 H, *J* = 3.6, 8.0 Hz), 4.48-4.50 (m, 1 H), 3.65 (dd, 1 H, *J* = 3.6, 11.6 Hz), 2.93 (dd, 1 H, *J* = 1.6, 11.6 Hz), 2.36-2.42 (m, 2 H), 1.53-1.58 (m, 2 H), 1.42-1.50 (m, 2 H), 0.98 (t, 3 H, *J* = 7.2 Hz); <sup>13</sup>C NMR (CD<sub>3</sub>OD)  $\delta$  156.54, 152.90, 151.82, 151.24, 143.93, 120.12, 117.42, 78.81, 74.39, 63.95, 36.27, 33.94, 32.02, 23.37, 14.28;  $[\alpha]_{\text{D}}^{25}$  -71.56 (*c* 0.10, MeOH); (ESI+) (M+H<sup>+</sup>) *m/z* 336.1494; Anal. Calcd for C<sub>15</sub>H<sub>21</sub>N<sub>5</sub>O<sub>2</sub>S: C, 53.71; H, 6.31; N, 20.88; O, 9.54; S, 9.56. Found: C, 53.99; H, 6.28; N, 20.98; S, 9.16.

### Molecular modeling

Ligand structures were generated with Concord and energy minimized using MMFF94s force field and MMFF94 charge until the rms of Powell gradient was 0.05 kcal mol<sup>-1</sup>Å<sup>-1</sup> in SYBYL 8.1.1 (Tripos International, St. Louis, MO, USA). The X-ray crystal structure of human A<sub>2A</sub> adenosine receptor (PDB code: 3EML) was prepared using Biopolymer Structure Preparation Tool in SYBYL. The docking study was carried out by GOLD v.4.1.2 (Cambridge Crystallographic Data Centre, Cambridge, UK), which employs a genetic algorithm (GA) and allows for full ligand flexibility and partial protein flexibility. The binding site was defined as the region of 9 Å extent around the co-crystallized ligand (ZM-241385). The side chains of the eight residues (i.e. Thr88, Phe168, Glu169, Trp246, Leu249, Asn253, Ser277, and His278) in the binding site were set to be flexible with 'crystal mode'. The ligands were docked using the GoldScore scoring function with 30 GA runs and other parameters were set as suggested by the GOLD authors. The Fast Connolly surface of the A<sub>2A</sub>AR and the Van der Waals surface of each ligand were generated by MOLCAD in SYBYL. All computation calculations were undertaken on Intel® Xeon™ Quad-core workstation with Linux Cent OS release 4.6.

### Binding assay

*Human A<sub>1</sub> and A<sub>2A</sub> Adenosine Receptors:* For binding to human A<sub>1</sub> receptors, [<sup>3</sup>H]PIA (1 nM) was incubated with membranes (40 µg/tube) from CHO cells stably expressing human A<sub>1</sub>



receptors at 25 °C for 60 min in 50 mM Tris·HCl buffer (pH 7.4; MgCl<sub>2</sub>, 10 mM) in a total assay volume of 200 µL. Nonspecific binding was determined using 10 µM of CPA. For human A<sub>2A</sub> receptor binding, membranes (20 µg/tube) from HEK-293 cells stably expressing human A<sub>2A</sub>ARs were incubated with 15 nM [<sup>3</sup>H]CGS21680 at 25 °C for 60 min in 200 µl 50 mM Tris·HCl, pH 7.4, containing 10 mM MgCl<sub>2</sub>. Reaction was terminated by filtration with GF/B filters.

*Human A<sub>3</sub> Adenosine Receptor:* For competitive binding assay, each tube contained 100 µL suspension of membranes (20 µg protein) from CHO cells stably expressing the human A<sub>3</sub>AR, 50 µL of [<sup>125</sup>I]I-AB-MECA (0.5 nM), and 50 µL of increasing concentrations of the nucleoside derivative in Tris·HCl buffer (50 mM, pH 7.4) containing 10 mM MgCl<sub>2</sub>, 1 mM EDTA. Nonspecific binding was determined using 10 µM of Cl-IB-MECA in the buffer. The mixtures were incubated at 25 °C for 60 min. Binding reactions were terminated by filtration through Whatman GF/B filters under reduced pressure using a MT-24 cell harvester (Brandell, Gaithersburgh, MD, USA). Filters were washed three times with 9 mL ice-cold buffer. Radioactivity was determined in a Beckman 5500B γ-counter.

For binding at all three subtypes, K<sub>i</sub> values are expressed as mean ± sem, n = 3-5 (outliers eliminated), and normalized against a non-specific binder, 5'-N-ethylcarboxamidoadenosine (NECA, 10 µM).<sup>9</sup> Alternately, for weak binding a percent inhibition of specific radioligand binding at 10 µM, relative to inhibition by 10 µM NECA assigned as 100%, is given.



```

HXV-F-3
expt1 std1h
SAMPLE 7 2010 DEC. 8 VT
date Jul 7 2010 dfreq 400.047
solvent DMSO d1
file ACQUISITION exp dpwr H1
ACQUISITION exp dof 30
sfreq 400.047 dm nmh
tn H1 dm 200
rt H1 dm 3.727 dm
nu 35380 dm
sw 4801.9 dres 1.0
fb not used homo
bs not used temp 25.0
tpwr 55
pw 8.0 wfile ft
d1 1.000 proc not used
lor -0.3 fn math.
c1 18
c2 18 werr
atlock n wepp
gain not used wbs
flags not used wnt
i1 n
i2 n
in n
dp y
hs DISPLAY mh
SP -391.0
WD 4801.8
VS 137
SC 0
WC 250
HZMM 0.63
IS 366.62
F1 1000.3
F2 1000.1
th 1
ins 1.000
nm

```

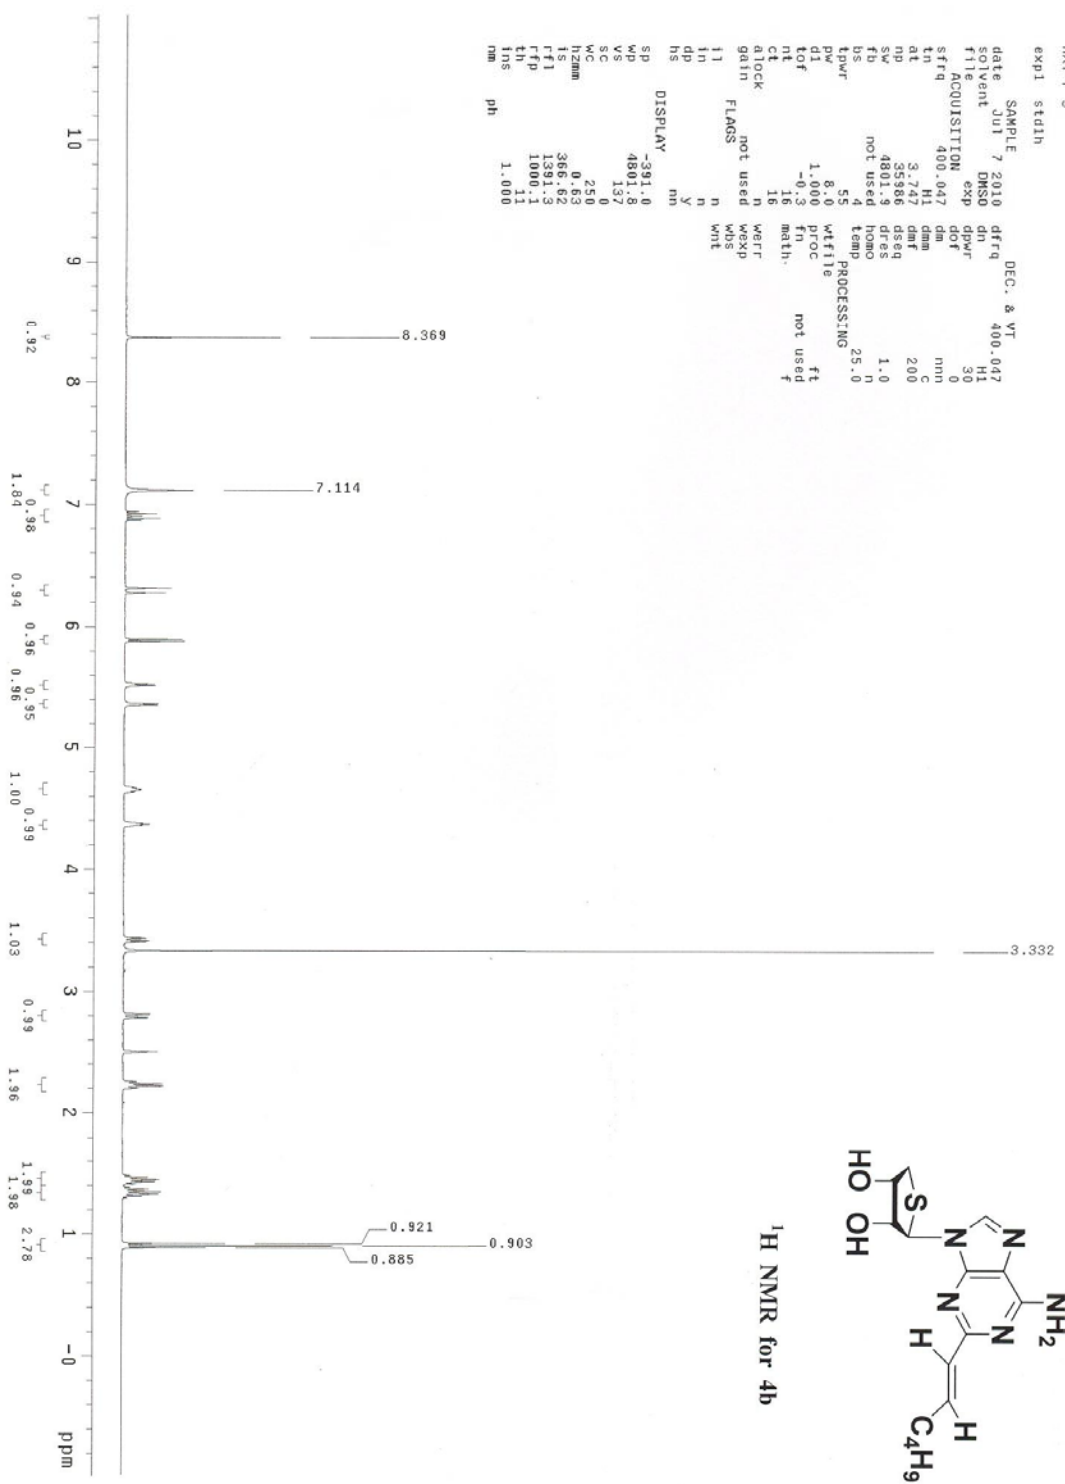

HXY-F-5

exp2 stdIn

```

SAMPLE      DEC. & VT
date      Jul 13 2010  dfrq      400.047
solvent   DMSO-d6      dmf      30
file      exp         dnmr      0
ACQUISITION  exp      dof      0
sfrq      400.047    dm       mm
tn        3.713      dmf      C
at        35656      dseq    200
np        4801.3     dres    1.0
sw        not used   temp    25.0
f2        not used   temp    25.0
hs        55         temp    25.0
t1wvr     8.0        wffile  ft
pw        1.000     proc    not used
di        -0.3      fn      f
tof       16        math    f
nt        16
ct        16
alock     not used  n       warr
gain      not used  n       warr
l1        n         y       wds
in        n         y       wds
dp        y         y       wds
hs        nm        nm

```

```

DISPLAY
sp      -391.3
wp      4801.3
vc      0.4
sc      250
wc      1.29
h2mm    36.89
is      1391.6
rfp     1000.1
th      16
rms     1.000
ph

```

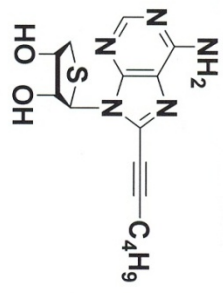

<sup>1</sup>H NMR for 4c

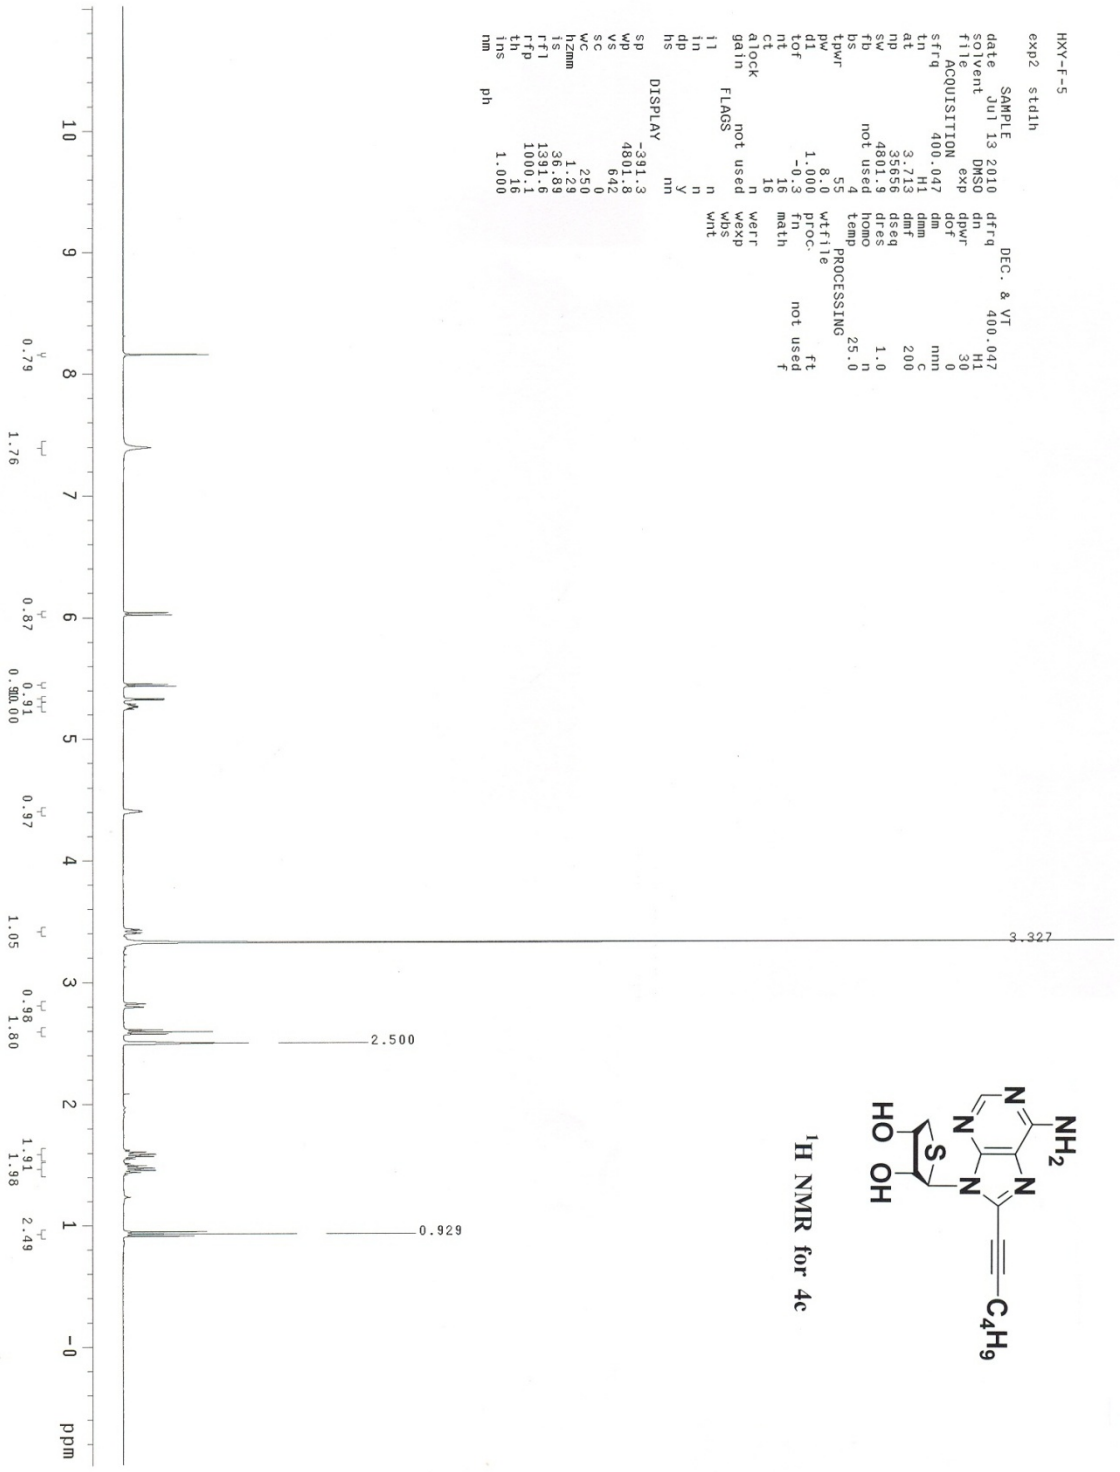





HXY-F-3

exps sta13c

```
SAMPLE      DEC. 8 VT
date       Jul 8 2010   dfreq      400.008
solvent    DMSO         dn
file       exp         dpwr      1043.9
ACQUISITION
sfrq      100.602      dm
tn        C13          dnm
at        0.308        dnr      10900
sd        4.308        dsedq
sp        242718       dsedq
fb        not used     homo    1.0
bs        not used     temp   25.0
tpwr      53          PROCESSING 2.00
pw        9.5         lb
d1        2.000        wlf11e
tof       1352.3      proc
nt        1390        tn
st        37         math
clock     n
gain      not used   warr
11        n          whs
ln        n          wht
dp        y
hs        y
DISPLAY   -1301.8
SD        1301.8
WD        22644.5
VS        535
SC        0
WC        250
hzmm      90.58
IS        182.83
TFD       4306.7
TD        37411
Ins       1.000
at        ph
```

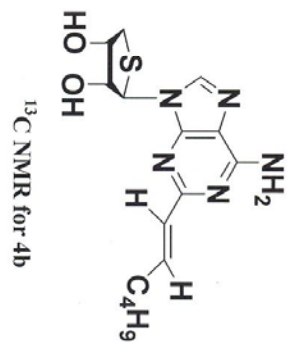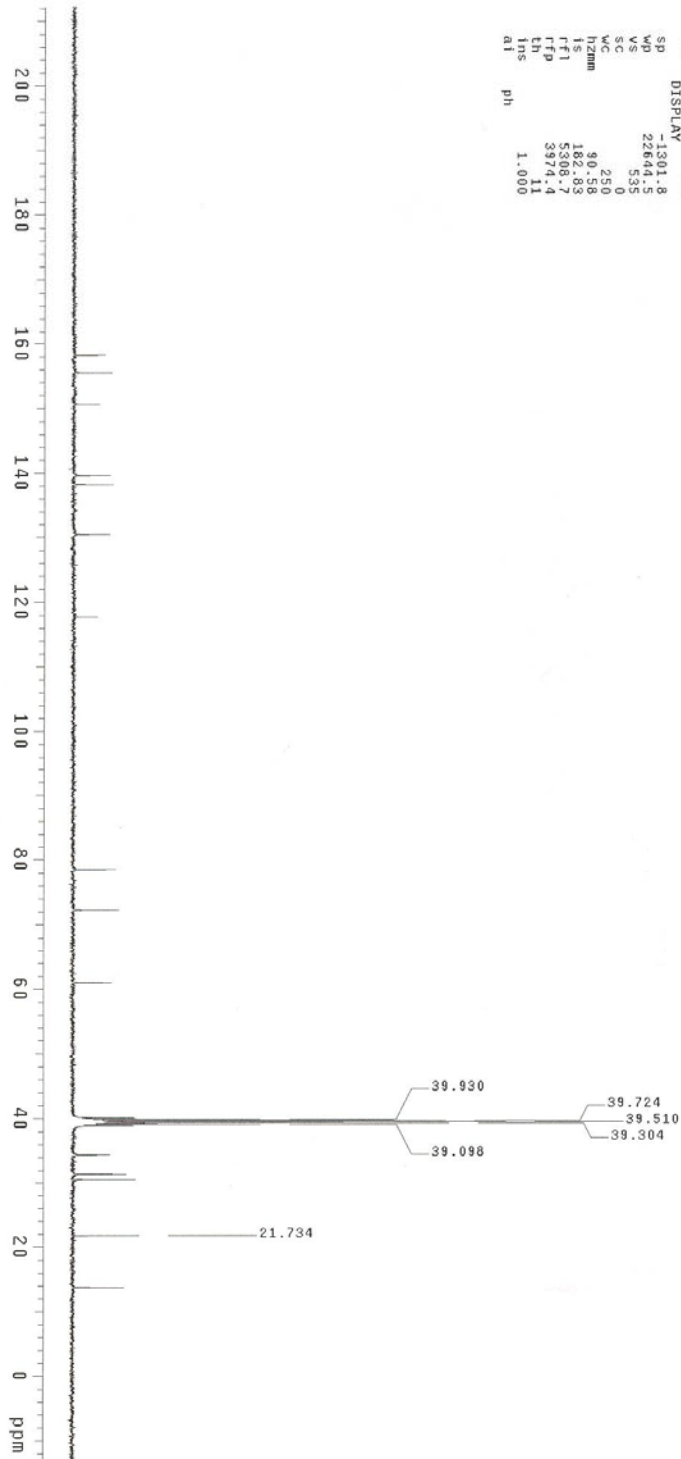

HXY-F-5  
exps std13c

SAMPLE DEC. & VT  
date Jul 15 2010 dfrq 400.048  
solvent DMSO dn H1  
file 41  
ACQUISITION exp dpr 1043.9  
sfrq 100.602 dm 10900  
nu 0.903 dmp  
at 0.903 dms  
np 44136 dseg  
sw 24271.8 dres 1.0  
fb not used homo n  
bs not used temp 25.0  
tpwr 53 lb PROCESSING 2.00  
pw 9.5 ufile  
tof 2.049 proc ft  
nt 13529 fn not used f  
ct 2000 math  
atlock 1488 n  
gain not used  
FLAGS not used  
werr wexp  
in n  
dn n  
dp y  
hs y  
DISPLAY nh  
sp -1301.8  
wp 20698.6  
vs 1546  
sc 0  
wc 250  
l2mm 82.250  
l1 91.41  
rf1 5308.7  
th 3974.4  
ins 23  
at 1.000  
ph

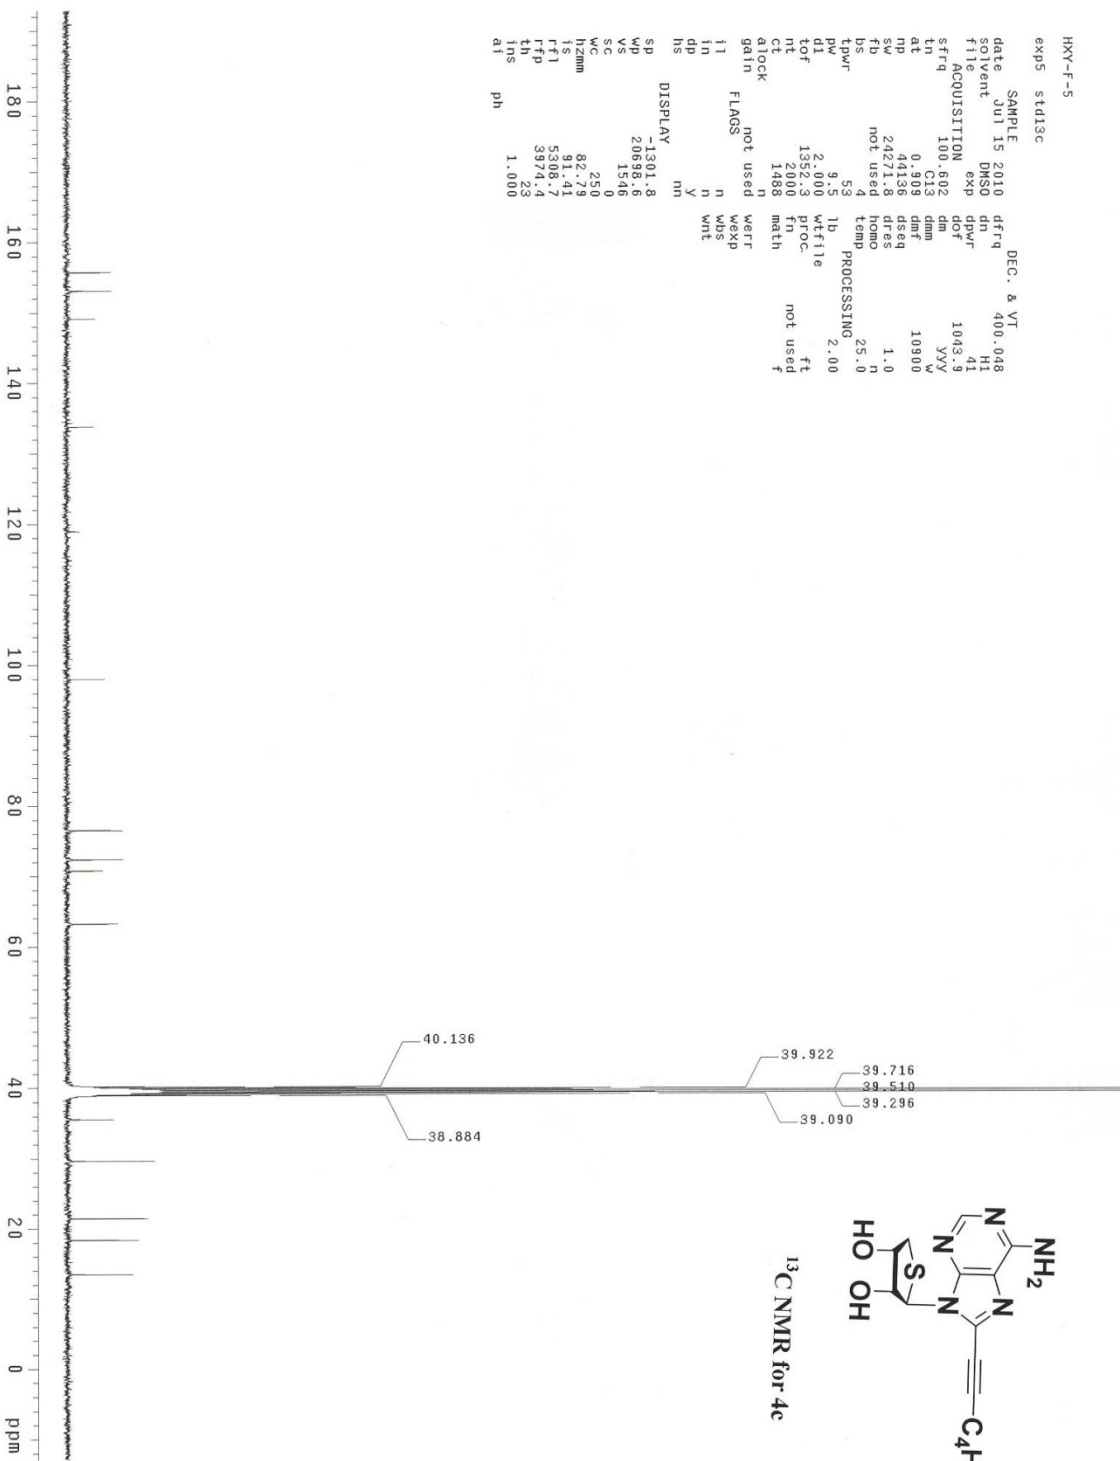

Supplement: ml1001823_si_001.pdf [file ml1001823_si_001.pdf]
